# Supplementary material for: Triiodothyronine or Antioxidants Block the Inhibitory Effects of BDE-47 and BDE-49 on Axonal Growth in Rat Hippocampal Neuron-Glia Co-Cultures
Source: MDPI journal article supplement (doi:10.3390/toxics10020092), 2022-02-18
Supplement: s1 [file s1]

## Article

# Supplementary Materials: Triiodothyronine or Antioxidants Block the Inhibitory Effects of BDE-47 and BDE-49 on Axonal Growth in Rat Hippocampal Neuron-Glia Co-Cultures

Hao Chen, Rhianna K. Carty, Adrienne C. Bautista, Keri A. Hayakawa and Pamela J. Lein

**Table S1.** Primer sequences and amplification efficiencies.

| Gene         | Primer 1 (5'-3')       | Primer 2 (5'-3')         | Amplification Efficiency (%) |
|--------------|------------------------|--------------------------|------------------------------|
| <i>Klf9</i>  | CACCGAATCTGGGTCGAGTC   | CCGTTACCTGTATGCACTC      | 100                          |
| <i>Cat</i>   | CGCTGAACAAGAAAGTAACCTG | CCATCCTTTATCCATAGCCAGAAG | 100                          |
| <i>Nos2</i>  | TGTCTGTGACTTTGTGCTTCT  | GACTGGACTTTTAGAGACGCTT   | 100                          |
| <i>Gclc</i>  | GCCGCCATTACAGTAACAAC   | ACATCTACCACGCAGTCAAG     | 100                          |
| <i>Gpx1</i>  | CCATTACCTCGCACTTCT     | AATCAGTTCGGACATCAGGAG    | 100                          |
| <i>Gpx4</i>  | CGCAGCCGTTCTTATCAATG   | CACTGTGGAAATGGATGAAAGTC  | 100                          |
| <i>Sod1</i>  | GCCTTGTGTATTGTCCCCATA  | CGTCATTCACTTCGAGCAGA     | 100                          |
| <i>Sod2</i>  | ATTGAACTTCAGTGCAGGCT   | CGACCTACGTGAACAATCTGA    | 100                          |
| <i>Nrf2</i>  | CAAGCGACTCATGGTCATCTAC | CAGTGGATCTGTCAGCTACTC    | 100                          |
| <i>Ppia</i>  | TTTGCAGACGCCGCTGT      | ATCAGCCGTGATGTCTGAAG     | 100                          |
| <i>Hprt1</i> | GGTGAAAAGGACCTCTCGAAG  | GCTTTTCCACTTTCGCTGATG    | 100                          |

**Table S2.** Average fold changes relative to vehicle of levels of transcripts encoding cellular antioxidants.

| Gene        | T3 (3 nM) | BDE-47 (200 nM) | BDE-49 (200 nM) | BDE-47 + T3 | BDE-49 + T3    |
|-------------|-----------|-----------------|-----------------|-------------|----------------|
| <i>Cat</i>  | 0.994     | 0.758           | 0.552           | 0.409       | 0.513          |
| <i>Nos2</i> | 1.003     | 0.888           | 0.236           | 0.176       | <b>0.107 *</b> |
| <i>Gclc</i> | 0.917     | 1.006           | 0.738           | 0.491       | <b>0.425 *</b> |
| <i>Gpx1</i> | 0.811     | 1.331           | 0.967           | 0.864       | 0.761          |
| <i>Gpx4</i> | 0.592     | 0.979           | 0.675           | 0.468       | 0.469          |
| <i>Sod1</i> | 1.096     | 1.473           | 0.813           | 1.535       | 1.171          |
| <i>Sod2</i> | 1.28      | 1.596           | 0.858           | 1.686       | 1.32           |
| <i>Nrf2</i> | 1.421     | 0.752           | 0.581           | 1.135       | 1.196          |

**Notes:** Data presented as the mean ( $n = 3$  independent dissections). Hippocampal cultures from PND 0-1 rat pups were treated with BDE-47, BDE-49 or vehicle (1:1000 DMSO) in the absence or presence of T3 for 48 h beginning at 3h post-plating. Fold changes in expression relative to vehicle treated cultures were calculated using REST 2009 software. \* Significantly different from vehicle at  $p < 0.05$  as determined by REST 2009 pairwise reallocation randomization test.

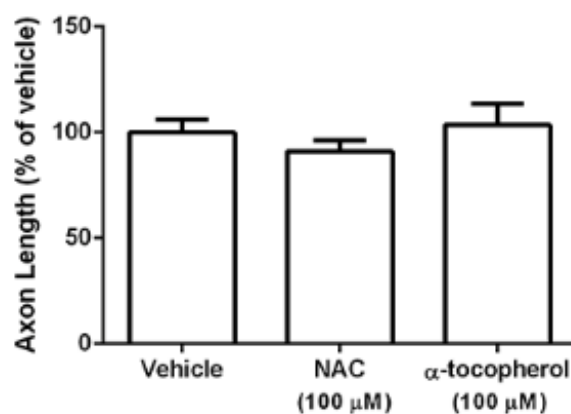

**Figure S1. The antioxidants NAC and  $\alpha$ -tocopherol do not alter axonal outgrowth relative to vehicle control cultures.** Primary neuron-glia co-cultures dissociated from the hippocampi of P0-1 rat pups were exposed to vehicle, N-acetyl cysteine (NAC) or  $\alpha$ -tocopherol. After a 48 h exposure, cultures were fixed and immunostained for tau-1. Axon length was quantified in tau-1 immunopositive cells ( $n = 70 - 90$  neurons from three independent dissections). Data presented as the mean  $\pm$  SE. No significant differences between groups was detected using one-way ANOVA ( $p < 0.05$ ).
